# Supplementary material for: Transcriptome Analysis Identifies Genes Associated with Chlorogenic Acid Biosynthesis during Apple Fruit Development
Source: MDPI journal article supplement (doi:10.3390/horticulturae9020217), 2023-02-06
Supplement: s1 [file s1]

**Table S1.** List of primers used for the qRT-PCR.

| Gene Name      | Primer Sequence (5'-3')-FP | Primer Sequence (5'-3')-RP |
|----------------|----------------------------|----------------------------|
| <i>MdActin</i> | GGATTTGCTGGTGATGATGCT      | AGTTGCTCACTATGCCGTGC       |
| <i>MdHCT1</i>  | GCCCTCGACTATCTTGAGCT       | GGTTTGCAGAGAAATGGCCA       |
| <i>MdHCT2</i>  | GCCCTCGACTATCTTGAGCT       | AAATGCCAACCCCTCGAATG       |
| <i>MdHCT3</i>  | AAGCAACACATGGAGAAGGC       | CAACGTCACAAAGGCCTCAA       |
| <i>MdHCT4</i>  | TGGTGCAGGTTCCCAATGTA       | GCGCTCAAACACATCCAGTT       |
| <i>MdHCT5</i>  | TGCAGGTTCCCAGTGATGA        | GCGCTCGAACACATCCAATT       |
| <i>MdHCT6</i>  | GTTCAACCTGATCTGTCGGC       | AACACAAAAGCCAACCCCTC       |
| <i>MdC3H1</i>  | TCCGATACGAAGCAACTC         | CTGCAAATCATAACCTCAAC       |
| <i>MdC3H2</i>  | GACTTGTCGGAAAATCCA         | GAAGGGTAGCGAAAAGAA         |
| <i>MdC3H3</i>  | CTCACGGGCTTAATGTCG         | AATCTCCCTCCAACCTCTG        |
